# Supplementary material
Source: PubMed Central journal article supplement (PMC5938144)
Supplement: NIHMS948827-supplement-supplement_1.pdf [file NIHMS948827-supplement-supplement_1.pdf]

**Table S1.** List of major allergens identified in the complex PN antigen by mass spectrometry.

| <b>Proteins Identified</b> |
|----------------------------|
| <i>Known Allergens</i>     |
| Ara h1                     |
| Ara h3                     |
| Ara h6                     |
| Ara h2 (conglutin-7)       |
| Ara h8                     |
| Ara h7                     |
| <i>Other proteins</i>      |
| Arachin 6                  |
| Gly                        |
| Galactose binding lectin   |
| Conarachin                 |
| Arachin Ahy-4              |
| Arachin Ahy-3              |
| Arachin Ahy-2              |
| PN agglutinin              |
